# Supplementary material for: Structure and electrochemical activity of nickel aluminium fluoride nanosheets during urea electro-oxidation in an alkaline solution
Source: Royal Society of Chemistry journal article supplement (doi:10.1039/d0ra10814f), 2021-01-01
Supplement: d0ra10814f1.pdf [file d0ra10814f1.pdf]

Structure and electrochemical activity of nickel aluminium fluoride nanosheets during urea  
electro-oxidation in an alkaline solution

Saba A. Aladeemy,<sup>a,b</sup> Abdullah M. Al-Mayouf,<sup>a,b</sup> Mabrook S. Amer,<sup>a</sup> Nouf H. Alotaibi,<sup>a</sup> Mark T. Weller,<sup>b</sup>

Mohamed A. Ghanem<sup>a\*</sup>

<sup>a</sup>Electrochemical Sciences Research Chair (ESRC), Chemistry Department, King Saud University, 11451

Riyadh, Saudi Arabia.

<sup>b</sup>K. A.CAR Energy Research and Innovation Center at Riyadh.

<sup>c</sup>Chemistry Department, Cardiff University, Cardiff, CF10 3AT, UK.

\* Corresponding author Email: mghanem@ksu.edu.sa; Tel: +966 114670405;

Fax: +96614675992, ORCID 0000-0003-2866-9016

**Supporting Information**

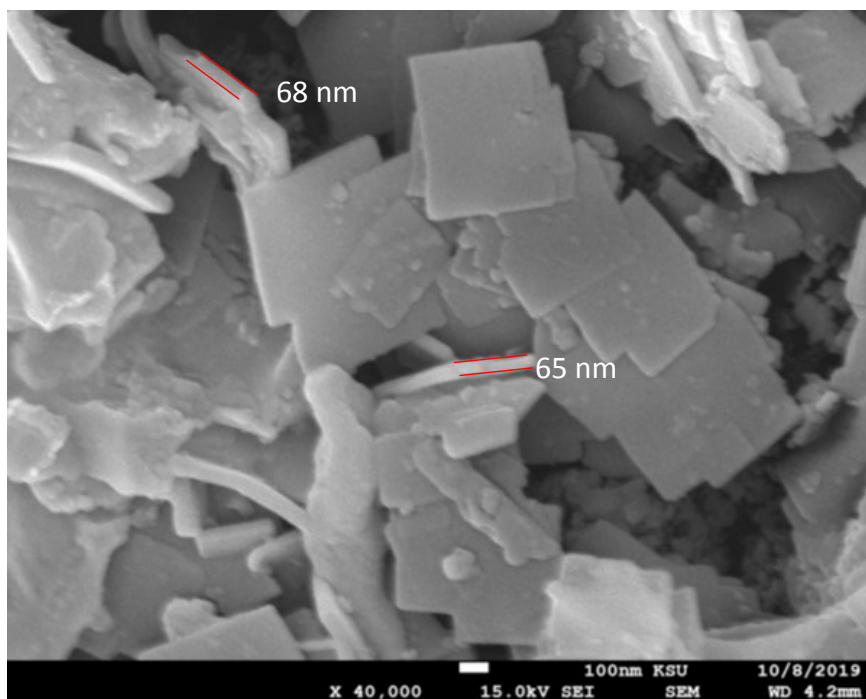

Fig. S1 High magnification image of KNiAlF<sub>6</sub> nanosheet showing the thickness of the nanosheets estimated at about 60 to 70 nm.

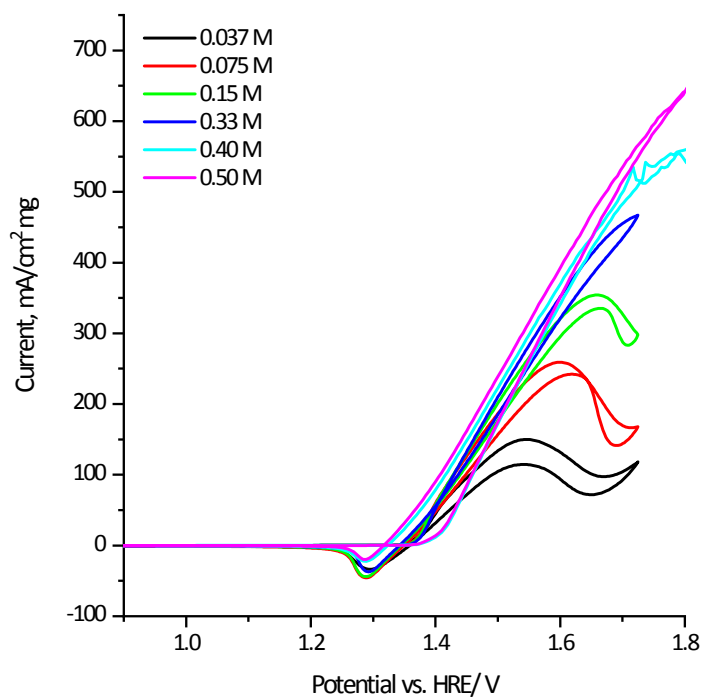

Fig. S2 Cyclic voltammograms of 100  $\mu\text{g}$  of the  $\text{KNiAlF}_6$  catalyst recorded at  $50 \text{ mV s}^{-1}$  in 1.0 M KOH containing various concentrations of urea (0.0375, 0.075, 0.15, and 0.33 , 0.40 and 0.50 M).

Further increase of urea concentration above 0.33 M showed a small current enhancement in urea oxidation presumably because the reaction follows the EC mechanism and the competitive adsorption of urea with hydroxide ion at the catalyst surface decreases the generation rate of  $\text{NiOOH}$  species that mediates the urea oxidation in the chemical step. Therefore, an optimum ratio of urea/hydroxide concentration should be maintained to achieve the highest urea oxidation current.

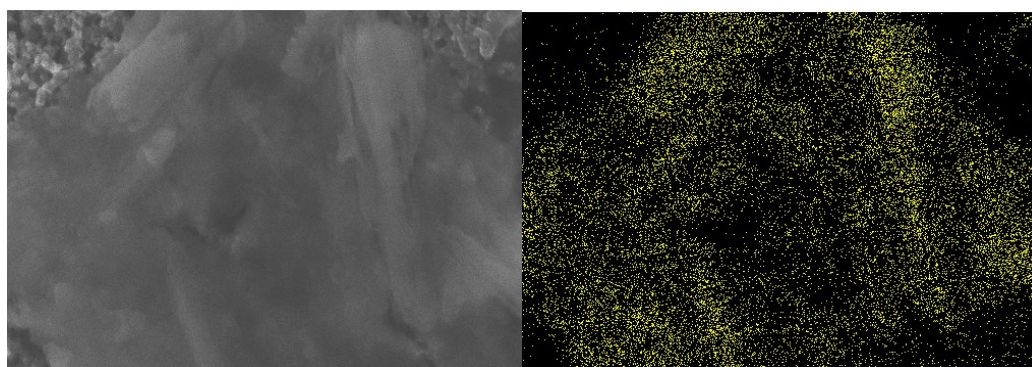

Electron Image 1

O Ka1

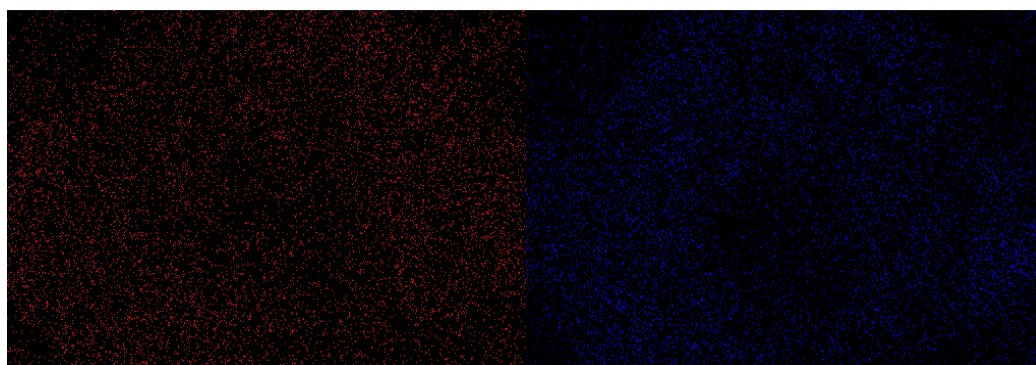

F Ka1\_2

K Ka1

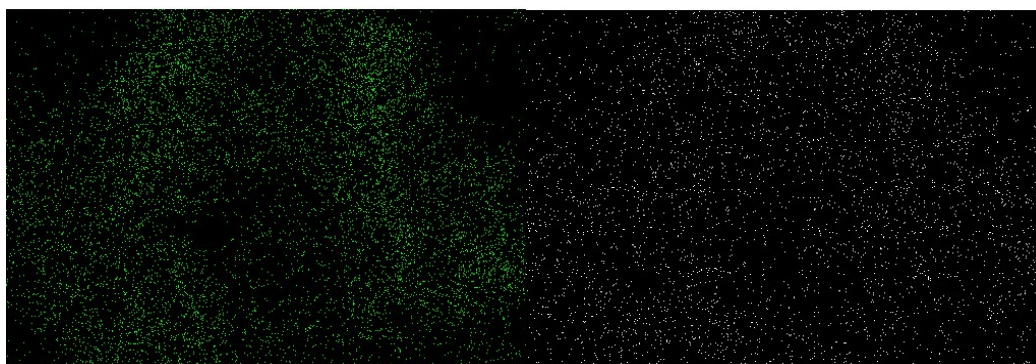

Ni Ka1

Al Ka1

Fig. S3 SEM image and the corresponding X-ray elemental mapping of the  $\text{KNiAlF}_6$  catalyst after been used in urea oxidation at  $60\text{ }^\circ\text{C}$  for 3.0 hours

Table S1 the EDX composition analysis of the  $\text{KNiAlF}_6$  catalyst after and before been used in urea electrolysis.

| Element | Wt. %     | Wt. %      |
|---------|-----------|------------|
|         | After use | Before use |
| O K     | 28.27     | 5.35       |
| F K     | 28.55     | 51.8       |
| Al K    | 9.35      | 10.75      |
| K K     | 9.18      | 11.83      |
| Ni K    | 24.65     | 25.62      |
| Totals  | 100.00    |            |
